# Supplementary material for: Combined effects of scanning ultrasound and a tau-specific single chain antibody in a tau transgenic mouse model
Source: PubMed Central journal article supplement — Brain. 2017 Apr 4;140(5):1220–30. doi: 10.1093/brain/awx052 (PMC5405237; doi:10.1093/brain/awx052), 2017-04-04

**Supplementary Figure 1. RN2N scFv specifically recognizes 2N tau isoforms.** (A) The six human brain tau isoforms each differ according to the presence of zero, one or two amino-terminal inserts (0N, 1N or 2N) (blue) and the presence of three or four microtubule-binding repeat domains (purple). RN2N detects an epitope that borders the two N-terminal inserts. (B) Recombinant 0N, 1N and 2N mouse tau isoforms were electrophoresed and western blotted with Tau-5 or RN2N IgG. (C) Size exclusion chromatography reveals RN2N scFv is a stable monomer. (D) Electrophoresed purified RN2N scFv is approximately 28 kDa in size and detectable via its C-terminal myc-tag. (E) The binding activity of the RN2N scFv and IgG were determined by ELISA on a human tau-coated plate and compared to a control scFv. The  $EC_{50}$  of the RN2N scFv and IgG were calculated to be  $8.56 \times 10^{-8}$  M and  $1.2 \times 10^{-8}$  M respectively. (F) The isoform specificity of RN2N scFv was determined by ELISA on a plate coated with 0N, 1N or 2N mouse tau isoforms and compared to a control scFv. RN2N scFv only bound to the 2N isoform.

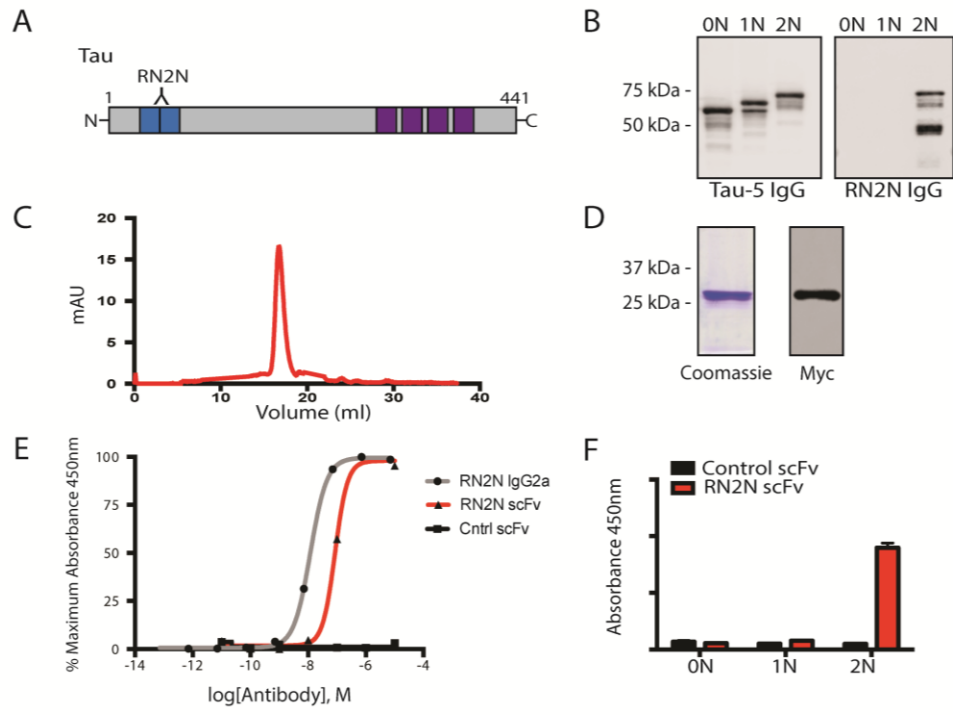

Supplement: awx052_Supp.pdf [file awx052_Supp.pdf]
